# Supplementary material
Source: PubMed Central journal article supplement (PMC5543396)
Supplement: ja7b02428_si_001.pdf [file ja7b02428_si_001.pdf]

**Supporting Information** for:

Photoelectron Transfer Dissociation Reveals Surprising Favorability of Zwitterionic States in Large Gaseous Peptides and Proteins

James Bonner, Yana A. Lyon, Christopher Nellessen, and Ryan R. Julian\*

Department of Chemistry, University of California, Riverside, California 92521, United States

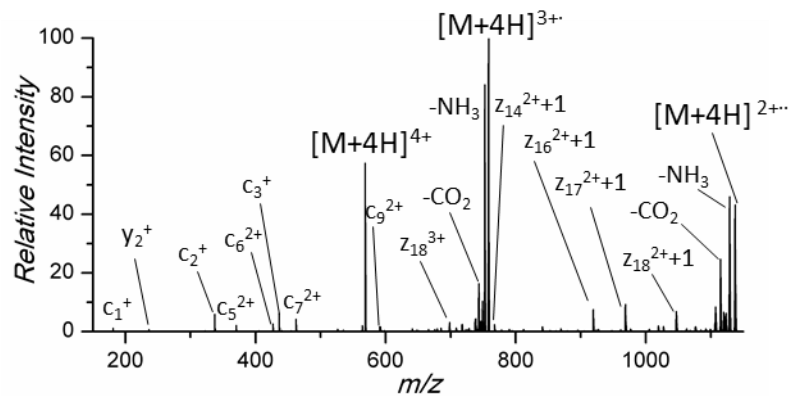

**Figure S1.** ETD of CD36 4+ results in several charge-reduced species as well as c/z-type fragmentation.

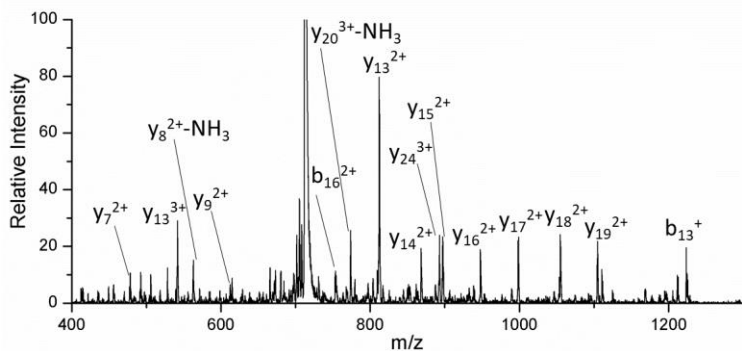

**Figure S2.** UVPD of melittin 4+ shows no c/z type fragmentation, but a large abundance of b/y fragmentation.

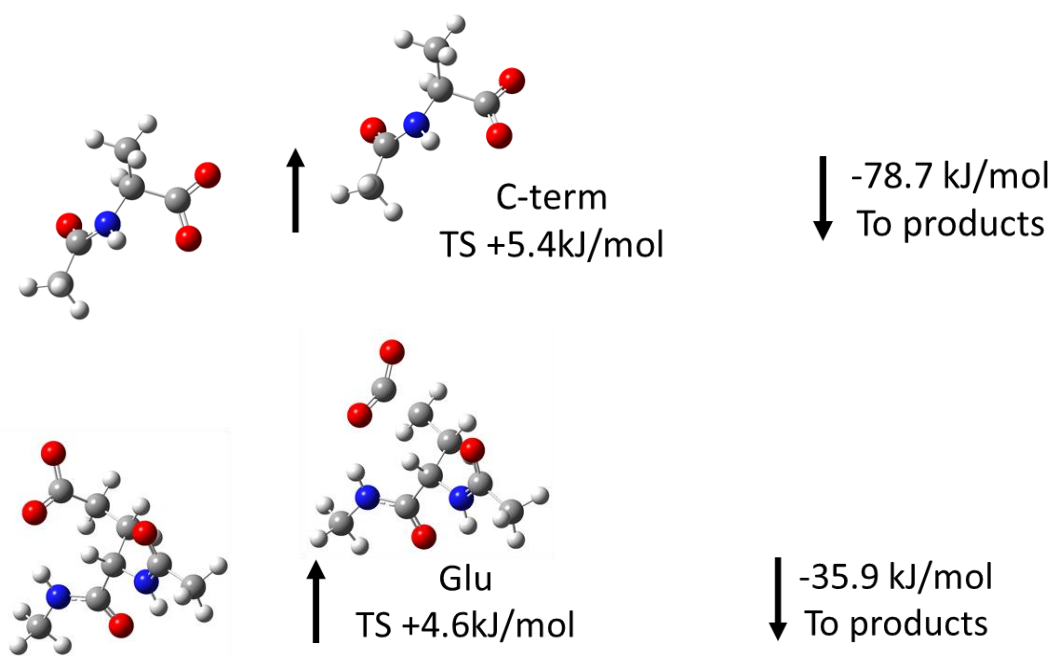

**Scheme S1.** Structures of radical and transition state for model of the c-terminus and glutamic acid.

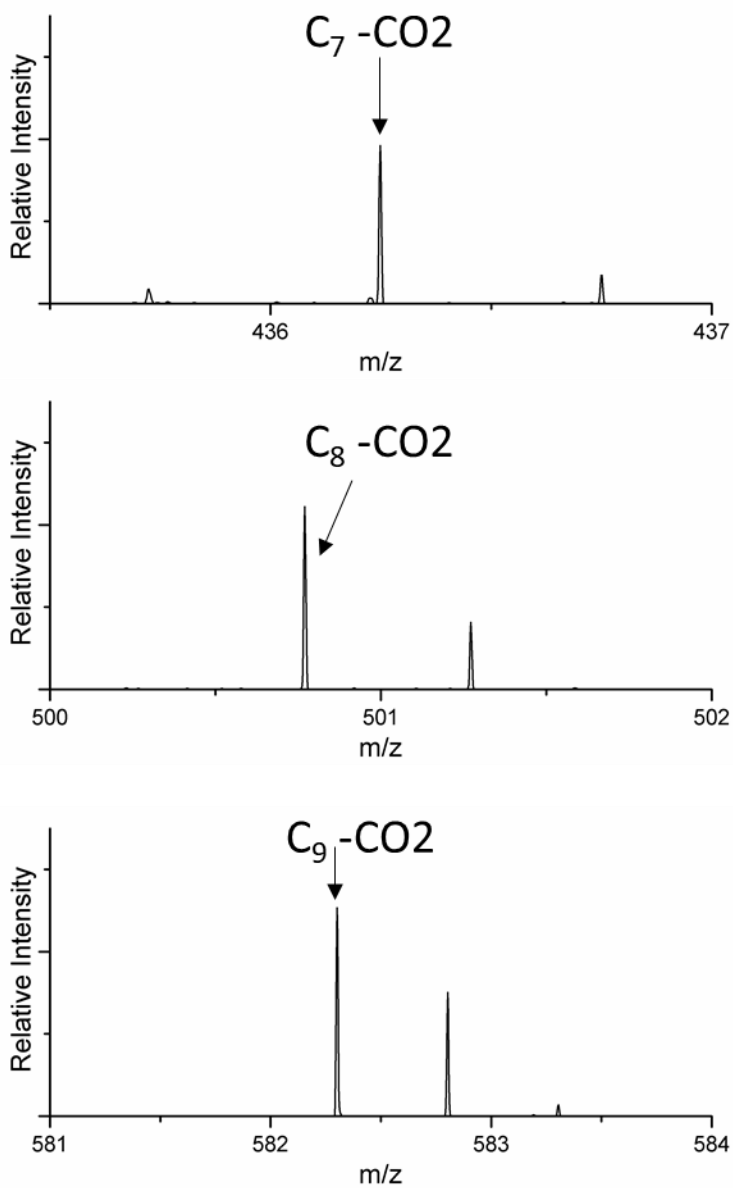

**Figure S3.** Zooms of several c-CO<sub>2</sub> ions for Figure 2c. Note the lack of a -45 Da peak in all spectra. The small -1 Da peak in the c<sub>7</sub>-CO<sub>2</sub> ion is outside the mass error expected for a confident match on our orbitrap instrument.

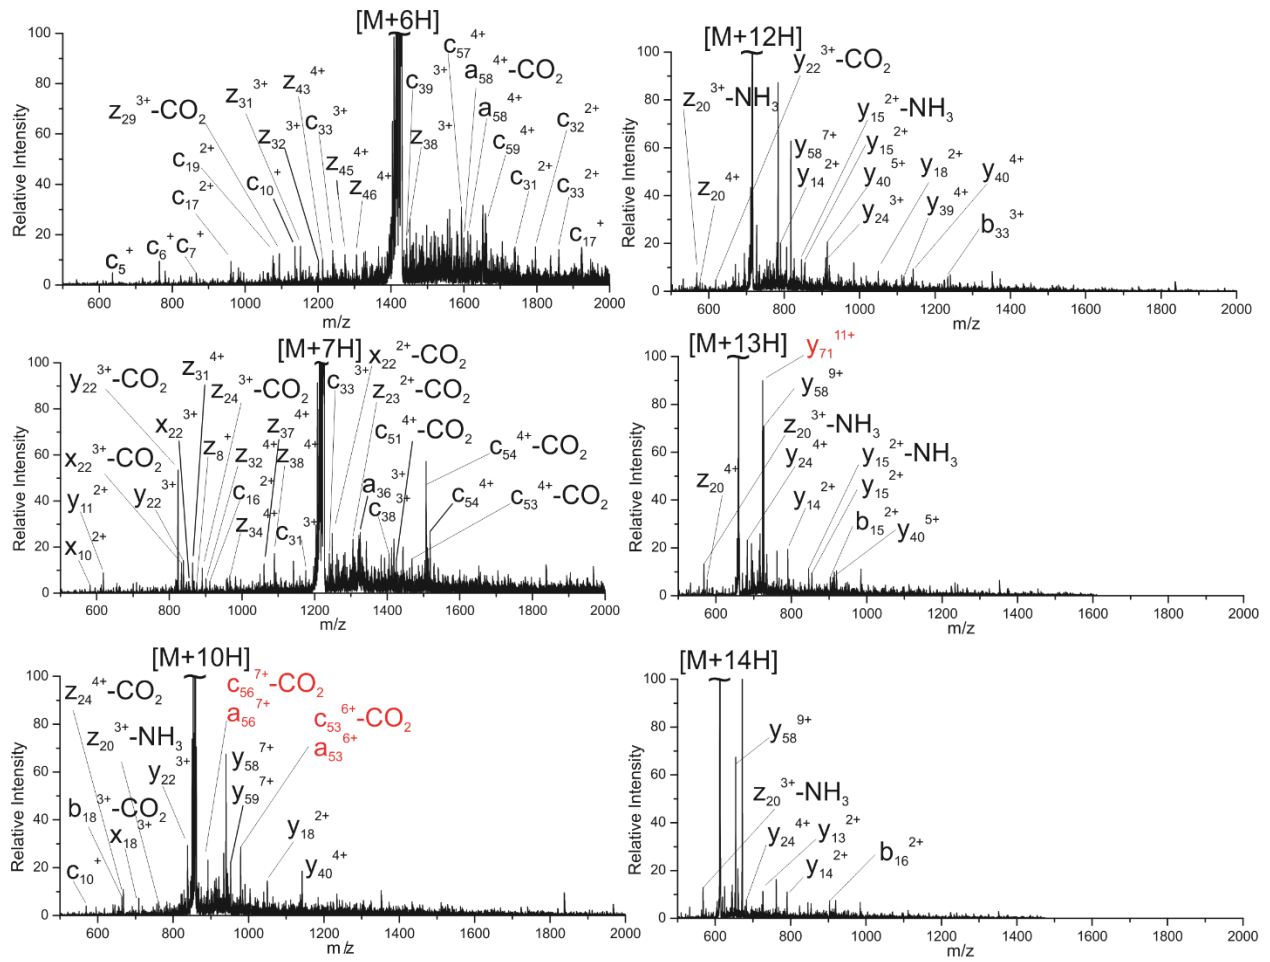

**Figure S4.** Mass spectra resulting from PETD experiments on Ubiquitin 6+, 7+, 10+, 12+, 13+ and 14+ ions.

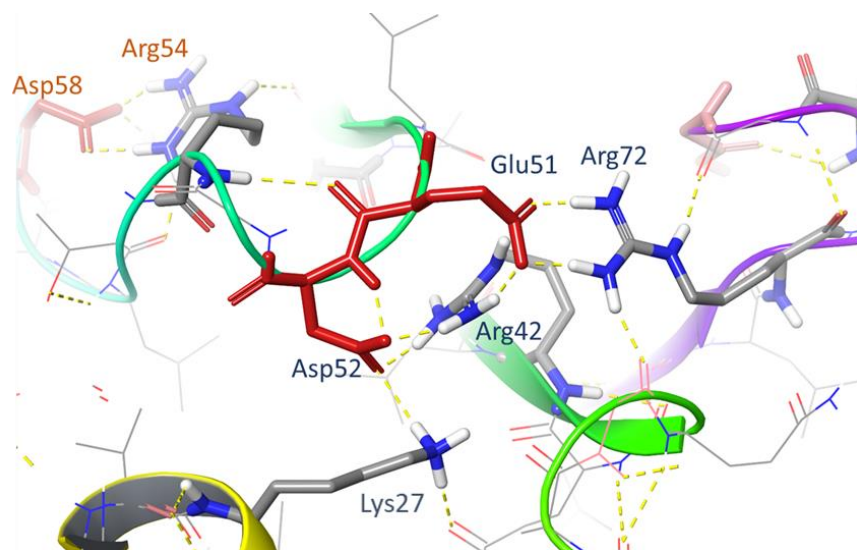

**Figure S5.** The Lys27-Asp52-Arg42-Glu51-Arg72 salt cluster which persists in all charge isomers evaluated by MD for the UBQ 6+ ion.

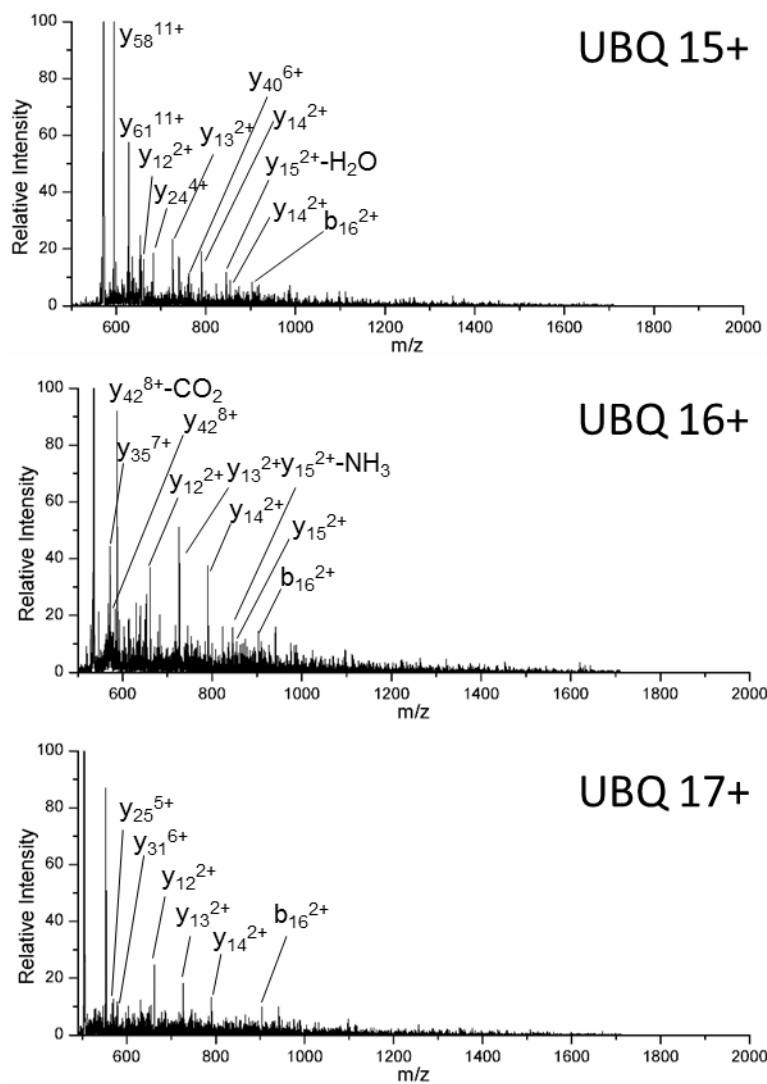

**Figure S6.** Mass spectra for UVPD of Ubiquitin 15-17+ ions. None of these charge states appear to be zwitterionic as noted by a complete lack of c/z-type ions.
